# Supplementary material for: Quantitative image analysis applied to revise the taxonomy of the Palearctic Earophila badiata species group (Lepidoptera: Geometridae: Larentiinae)
Source: PeerJ. 2026 Feb 19;14:e20620. doi: 10.7717/peerj.20620 (PMC12925412; doi:10.7717/peerj.20620)
Supplement: Supplemental Information 1 [file peerj-14-20620-s001.xlsx]

## Sheet: Taul1
	Earophila badiata species group revision: Supplementary information S1
	Table S1: Morphology dataset sample specimen data
	Photo label #	Specimen origin	"subspecies"	Sex	Label data	Latitude (N)	Longitude (E)	Wear	Year of collection	ex o/e larva = 1	remarks	Genitali prep. #	Barcode label #	Fig.2 panel	Fig.4 panel	Fig.5 panel	Fig.6 panel
	1	FI S-W	b	m	SUOMI A:Lemland 667:11 Flaka, 6.5.1996, Mikael Englund leg.	60	20.15	2	1996	0		..	..	..	..	..	..
	2	FI S-W	b	f	SUOMI A:Lemland 667:11 Flaka, 6.5.1996, Mikael Englund leg.	60	20.15	2	1996	0		..	..	..	..	..	..
	3	FI S-W	b	m	SUOMI A:Föglö 668:14 E.O.1992, Kai Saloranta leg.	60.01	20.41	1	1992	1		..	..	..	..	..	..
	4	FI S-W	b	f	SUOMI A:Lemland 667:11 Flaka, EX OVO 1995, Mikael Englund leg.	60	20.15	1	1996	1		..	..	2c	..	..	..
	5	FI S-W	b	m	SUOMI A:Lemland 667:11 Flaka, 6.5.1996, Mikael Englund leg.	60	20.15	2	1996	0		..	..	2d	..	..	..
	6	FI S-W	b	f	SUOMI A:Lemland 667:11 Flaka, EX OVO 1995, Mikael Englund leg.	60	20.15	2	1996	1		..	..	..	..	..	..
	7	FI S-W	b	m	SUOMI A:Lemland 667:11 Flaka, 6.5.1996, Mikael Englund leg.	60	20.15	2	1996	0		..	..	..	..	..	..
	8	FI S-W	b	f	SUOMI A:Föglö 668:14 E.O.1992, Kai Saloranta leg.	60.01	20.41	1	1993	1		..	..	..	..	..	..
	9	FI Kar	f	m	FENNIA PK:Pyhäselkä, Ex ovo 1993, Mikael Englund leg.	62.26	29.58	1	1993	1		..	..	2p	..	..	..
	10	FI Kar	f	f	FENNIA PK:Pyhäselkä, Ex ovo 1993, Mikael Englund leg.	62.26	29.58	1	1993	1		..	..	2l	..	..	..
	11	FI Kar	f	m	FENNIA PK:Pyhäselkä, Ex ovo 1993, Mikael Englund leg.	62.26	29.58	1	1993	1		..	..	..	..	..	..
	12	FI Kar	f	f	FENNIA PK:Pyhäselkä, 15.5.1993, Mikael Englund leg.	62.26	29.58	1	1993	0		..	..	..	..	..	..
	13	FI Kar	f	m	FENNIA PK:Pyhäselkä, Ex ovo 1993, Mikael Englund leg.	62.26	29.58	1	1993	1		..	..	..	..	..	..
	14	FI Kar	f	f	FENNIA PK:Pyhäselkä, 14.5.1993, Mikael Englund leg.	62.26	29.58	1	1993	0		..	..	..	..	..	..
	15	FI Kar	f	m	FENNIA PK:Pyhäselkä, Ex ovo 1993, Mikael Englund leg.	62.26	29.58	1	1993	1		..	51	..	..	..	..
	16	FI Kar	f	f	FENNIA PK:Pyhäselkä, 14.5.1993, Mikael Englund leg.	62.26	29.58	1	1993	0		..	..	2o	..	..	..
	17	FI S	b	f	FENNIA U:Järvenpää 60.466228. 25.119439, 30.5.2024, Mikael Englund leg.	60.46	25.11	3	2024	0		..	..	..	..	..	..
	18	FI S	b	m	FENNIA U:Järvenpää 670:39, 13.5.2021, Mikael Englund leg.	60.46	25.11	2	2021	0		..	33	2e	..	..	..
	19	FI S	b	m	FENNIA U:Järvenpää 60.466228. 25.119439, 25.5.2024, Mikael Englund leg.	60.46	25.11	2	2024	0		..	..	..	..	..	..
	20	FI S-W	b	m	Fennia Al Föglö Bänö 8.5.1965 P.Grotenfelt	60.09	20.58	1	1965	0		..	..	..	..	..	..
	21	FI S-W	b	f	Fennia Al Föglö Bänö 10.5.1965 P.Grotenfelt	60.09	20.58	2	1965	0		..	..	..	..	..	..
	22	FI S-W	b	m	Fennia Al Föglö Bänö 10.5.1965 P.Grotenfelt	60.09	20.58	2	1965	0		..	..	..	..	..	..
	23	FI S-W	b	f	Fennia Al Föglö Bänö 10.5.1965 P.Grotenfelt	60.09	20.58	1	1965	0		..	..	2f	..	..	..
	24	FI S-W	b	f	Fennia Al Föglö Bänö 10.5.1965 P.Grotenfelt	60.09	20.58	2	1965	0		..	..	..	..	..	..
	25	FI S-W	b	f	Fennia Al Föglö Bänö 10.5.1965 P.Grotenfelt	60.09	20.58	2	1965	0		29	..	..	..	..	6a
	26	FI S-W	b	m	Fennia Al Föglö Bänö 10.5.1965 P.Grotenfelt	60.09	20.58	2	1965	0		28	..	..	4a	5a	..
	27	FI S-W	b	f	FENNIA A: Geta e.l. 4.2.1989 J. Airsto leg.	60.37	19.84	1	1989	1		..	..	..	..	..	..
	28	FI Kar	f	m	FENNIA Kb. Pyhäselkä ex o 1963 V. Mannelin leg.	62.51	29.81	2	1963	J		..	..	2j	..	..	..
	29	FI S-W	b	m	FENNIA A:Föglö 668:14 e.l. 18.2.1955, Max v. Schantz	60.01	20.41	1	1955	1		..	..	2a	..	..	..
	30	FI S-W	b	f	FENNIA A:Föglö 668:14 e.l. 18.2.1955, Max v. Schantz	60.01	20.41	1	1955	1		..	..	2b	..	..	..
	31	FI S-W	b	m	SUOMI Finström 26.4.1994 M. Saarikoski leg.	60.23	19.98	2	1994	0		..	..	..	..	..	..
	32	FI S-W	b	f	FENNIA A:Föglö 668:14 e.l. 18.2.1955, Max v. Schantz	60.01	20.41	1	1955	1		36	..	..	..	..	6c
	33	SE	b	m	SVERIGE BLE: Lanskrona 23.4.1995 S. Karhula leg./http://id.luomus.fi/F.184615 Univ. of Helsinki Luomus. 2018	55.87	12.84	2	1995	0		25	..	..	..	..	..
	34	SE	b	m	Sweden SK, Österslöv, 12.4.1953, Ingvar Svensson leg.	56.09	14.25	1	1953	0		37	..	..	4c	5c	..
	35	HU	b	m	Hungary, Pecs, 25.3.1955, dr.Kovacs leg	46.07	18.22	1	1955	0		..	..	2g	..	..	..
	36	FI S	b	m	Finland 667:338, N: Helsinki Vallisaari, 29.4.-9.5.2016, Aarno & Jaakko Kullberg leg.	60.13	25	3	2016	0		..	65	2h	..	..	..
	37	FI S	b	m	Finland, U, Espoo, Svinösund 4.-7.5.2018, K. Nissinen leg.	60.12	24.69	2	2018			35	56	..	4b	5b	..
	38	FI S	b	f	FENNIA, EH:Koski 2021, Kimmo Silvonen leg.	61.02	25.15	2	2021			34	68	..	..	..	6b
	39	CH N-E	..	f	NE CHINA Hellongiang distr. Fengin Bios. Res. 12.5.2000, J. Kullberg leg.	48.13	129.18	2	2000			..	40	2i	..	..	..
	40	RU Bu	..	m	RUSSIA Buryatia 52o40'N 108o05E, R-438 on Haim r.550m, taiga for., 1.5.1998, J. Kullberg leg.	52.66	108.08	2	1998			33	55	..	4f	5f	..
	41	FI Kar	f	m	FENNIA PK:Lieksa 21.5.1979, H: Roininen leg.	63.32	30.02	2	1979			..	..	..	..	..	..
	42	FI Kar	f	m	SUOMI PK:Joensuu, 18.5.1989, Stig Ekbald leg.	62.58	29.75	2	1984			..	..	..	..	..	..
	43	FI Kar	f	f	Finland, PK, Lieksa, Kylänlahti 29.4.1990, T. Heiramo leg.	63.37	29.71	1	1990			..	62	..	..	..	..
	44	FI Kar	f	f	FENNIA PK:Lieksa 21.5.1979, H: Roininen leg.	63.32	30.02	2	1979			..	..	..	..	..	..
	45	FI Kar	f	m	FENNIA PK:Lieksa,703:63, Kylänlahti 22.4.1989, T. Heiramo leg.	63.37	29.71	2	1989			..	..	..	..	..	..
	46	FI Kar	f	f	Finland, PK, Lieksa, Kylänlahti 22.4.1989, T. Heiramo leg.	63.37	29.71	1	1990			..	66	..	..	..	..
	47	FI Kar	f	f	SUOMI PK:Joensuu, 694:64, Siihtala 18.5.1989, J. Vuorinen leg.	62.61	29.71	1	1980			..	..	..	..	..	..
	48	FI Kar	f	m	Finland, PK, Lieksa, Kylänlahti 22.4.1989, T. Heiramo leg.	60.12	24.69	2	1989			..	..	..	..	..	..
	49	FI Kar	f	m	FENNIA PK:Joensuu, 694:64, 19.5.1978, J. Vuorinen leg.	62.61	29.71	1	1978			..	..	..	..	..	..
	50	FI Kar	f	m	FENNIA Kb. Pyhäselkä, Niitylahti 14.5.1963 V. Mannelin leg./http://id.luomus.fi/EA7.0MB Digitatum 2011.10.31	62.51	29.81	2	1963			..	..	2m	..	..	..
	51	FI Kar	f	m	FENNIA Kb. Pyhäselkä, Niitylahti 18.5.1960 V. Mannelin leg.	62.51	29.81	2	1960			..	..	..	..	..	..
	52	FI Kar	f	m	FENNIA Kb. Pyhäselkä Hammaslahti ex o 1958 V. Mannelin	62.43	29.96	1	1958			..	..	..	..	..	..
	53	FI Kar	f	m	FENNIA Kb. Pyhäselkä, Niitylahti 10.5.1965 V. Mannelin leg.	62.51	29.81	2	1965			..	..	..	..	..	..
	54	FI Kar	f	f	FENNIA Kb. Pyhäselkä, Niitylahti 12.5.1963 V. Mannelin leg./http://id.luomus.fi/EA7.0MF Digitatum 2011.10.31	62.51	29.81	2	1963			26	..	..	..	..	6d
	55	FI Kar	f	m	FENNIA Kb. Pyhäselkä Hammaslahti ex l 1958 V. Mannelin leg.	62.51	29.81	2	1958			..	..	..	..	..	..
	56	FI Kar	f	m	Suomi PK. Lieksa 9.5.1983 E. Lappi leg.	62.43	29.96	1	1983			..	..	..	..	..	..
	57	RU Kar	f	m	Itä-Karjala LV. Paatene 11.5.1943, O. Peltonen / 4122	63.3	30.05	3	1943			27	..	..	4d	5d	..
	58	RU Kar	f	f	ÄtK: Poventsa, 5.6.1944/ Mus.Zool. H:fors, Spec.typ. No 7223 Cidaria badiata f.geogr. Fennocarelica Kaisila.	63.28	33.41	2	1944			..	..	2q	..	..	..
	59	RU Kar	f	m	Paatene 7.5.43, O. Peltonen/ Mus.Zool. H:fors, Spec.typ. No Cidaria badiata f.geogr. Fennocarelica	62.84	34.82	3	1943			31	..	..	4e	5e	..
	60	RU Kar	f	f	ÄtK: Poventsa, 5.6.1944 J. Kaisila/ Mus.Zool. H:fors, Spec.typ. No Cidaria badiata f.geogr. fennocarelica	63.28	33.41	3	1944			..	..	2k	..	..	..
	61	RU Kar	f	f	Äänislinna, 22.5.1944, Karvonen	62.84	34.82	2	1944			32	..	..	..	..	6f
	62	RU Kar	f	f	ÄtK. Poventsa, 29.5.1944, J. Kaisila	61.74	34.34	3	1944			..	..	2n	..	..	..
	63	FI Kar	f	f	FENNIA Kb. Pyhäselkä Hammaslahti ex o 1958 V. Mannelin	62.84	34.82	1	1958			..	..	2r	..	..	..
	64	FI Kar	f	m	FENNIA Kb. Pyhäselkä 9.5.1965 V. Mannelin / coll Suomalainen	62.43	29.96	2	1965			..	..	..	..	..	..
	65	FI Kar	f	f	FENNIA Kb. Pyhäselkä, Niitylahti ex o.1979 V. Mannelin leg.	62.51	29.81	1	1979			..	..	..	..	..	..
	66	FI Kar	f	f	FENNIA Kb. Pyhäselkä Hammaslahti ex L 1958 V. Mannelin	62.43	29.96	2	1958			..	..	..	..	..	..
	67	FI Kar	f	m	FENNIA Kb. Pyhäselkä, Niitylahti 16.5.1969 V. Mannelin leg.	62.51	29.81	2	1969			..	..	..	..	..	..
	68	FI Kar	f	f	FENNIA Kb. Pyhäselkä 28.5.1964 V. Mannelin leg.	62.51	29.81	2	1964			30	..	..	..	..	6e
	69	FI Kar	f	f	FENNIA Kb. Pyhäselkä Hammaslahti ex o 1958 V. Mannelin	62.43	29.96	1	1958			..	..	..	..	..	..
	70	FI Kar	f	m	FENNIA Kb. Pyhäselkä Hammaslahti 23.5.1958 V. Mannelin	62.43	29.96	2	1958			..	..	..	..	..	..
	71	FI Kar	f	m	FENNIA Kb. Pyhäselkä Hammaslahti ex o 1960 V. Mannelin leg.	62.43	29.96	2	1960			..	..	..	..	..	..
	72	RU Kar	f	f	ÄtK: Poventsa, 8.6.1944 J. Kaisila/ Mus.Zool. H:fors, Spec.typ. No Cidaria badiata f.geogr. Fennocarelica	62.84	34.82	3	1944			..	..	..	..	..	..
