# Supplementary material for: Quantitative image analysis applied to revise the taxonomy of the Palearctic Earophila badiata species group (Lepidoptera: Geometridae: Larentiinae)
Source: PeerJ. 2026 Feb 19;14:e20620. doi: 10.7717/peerj.20620 (PMC12925412; doi:10.7717/peerj.20620)
Supplement: Supplemental Information 2 [file peerj-14-20620-s002.xlsx]

## Sheet: BOLDlist
	Earophila badiata species group revision: Supplementary information S2
	Table S2: Morphology dataset sample specimen data
	#	Sample ID	BOLG/GenBank #	Species	ssp	Collection Date	Country/Ocean	State/Province	Region	Sector	Exact Site	Lat	Lon	Elev	Identifier	Institution Storing	Extra Info
	1	BC ZSM Lep 42038	BOLD:AAC3576	Anticlea badiata tellensis	bt	19-Mar-1995	Morocco	Meknes-Tafilalet Region	Ifrane		Moyen Atlas Azrou, Cedre Gouraud	33.4	-5.16667	1850	Axel Hausmann	SNSB, Zoologische Staatssammlung Muenchen
	2	BC ZSM Lep 81393	BOLD:AAC3576	Anticlea badiata tellensis	bt	30-Mar-2013	Morocco		Marrakesh-Tensift-El Haouz		H. Atlas, Below Oukaimeden	31.2247	-7.82222	2200	Axel Hausmann	SNSB, Zoologische Staatssammlung Muenchen
	3	BC ZSM Lep 81394	BOLD:AAC3576	Anticlea badiata tellensis	bt	30-Mar-2013	Morocco		Marrakesh-Tensift-El Haouz		H. Atlas, Below Oukaimeden	31.2247	-7.82222	2200	Axel Hausmann	SNSB, Zoologische Staatssammlung Muenchen
	4	BC ZSM Lep 01309	BOLD:AAC3576	Earophila badiata	bb	25-Apr-1997	Germany	Bavaria	south	Munich	Oberschleiheim	48.257	11.545	480	Axel Hausmann	SNSB, Zoologische Staatssammlung Muenchen
	5	BC ZSM Lep 01667	BOLD:AAC3576	Earophila badiata	bb	23-Apr-2000	Germany	Bavaria	center	Regensburg	Regensburg - Kallmuenz	49.1678	11.9452		Andreas Segerer	SNSB, Zoologische Staatssammlung Muenchen
	6	BC ZSM Lep 01668	BOLD:AAC3576	Earophila badiata	bb	30-Apr-2000	Germany	Bavaria	center	Regensburg	Regensburg - Scheuchenberg	49.0209	12.2879		Andreas Segerer	SNSB, Zoologische Staatssammlung Muenchen
	7	BC ZSM Lep 02757	BOLD:AAC3576	Earophila badiata	bb	15-Apr-2007	Germany	Bavaria	south	Schlagenhofen	Schlagenhofen am Woerthsee	48.0436	11.1728	581	Axel Hausmann	SNSB, Zoologische Staatssammlung Muenchen
	8	BC ZSM Lep 02818	BOLD:AAC3576	Earophila badiata	bb	01-Apr-2007	Germany	Bavaria	south	Schlagenhofen	Schlagenhofen am Woerthsee	48.0436	11.1728	581	Axel Hausmann	SNSB, Zoologische Staatssammlung Muenchen
	9	BC ZSM Lep 08910	BOLD:AAC3576	Earophila badiata	b	24-Apr-2001	Turkey	Erzurum	Dogu Anadolu	Ispir	Dogu Karadeniz Daglari: Korga Dagi Koprukoy, Ispir	40.4167	40.9667	1600	Joerg Gelbrecht	Research Collection of Joerg Gelbrecht
	10	BC ZSM Lep 21924	BOLD:AAC3576	Earophila badiata	bb	15-Apr-2003	Germany	Saarland			Braunshausen				Axel Hausmann	SNSB, Zoologische Staatssammlung Muenchen
	11	BC ZSM Lep 23245	BOLD:AAC3576	Earophila badiata	bb	13-Apr-2009	Germany	Bavaria	Niederbayern	Landshut	Niederaichbach	48.6081	12.3113	235	Andreas Segerer	Research Collection of Theo Gruenewald
	12	BC ZSM Lep 26479	BOLD:AAC3576	Earophila badiata	bb	07-May-2003	France				Alpes Maritimes, Maurion, Val di Cayros	43.9967	7.52444	535	Axel Hausmann	SNSB, Zoologische Staatssammlung Muenchen
	13	BC ZSM Lep 75621	BOLD:AAC3576	Earophila badiata	bb	23-Mar-2012	Germany	Saarland	Nunkirchen		Nunkirchen	49.49	6.837	255	Axel Hausmann	SNSB, Zoologische Staatssammlung Muenchen
	14	BC ZSM Lep 78161	BOLD:AAC3576	Earophila badiata	bb	19-Apr-1993	Germany	Bavaria	Oberbayern		Oberschleissheim	48.2574	11.5452	481	Axel Hausmann	SNSB, Zoologische Staatssammlung Muenchen
	15	BC ZSM Lep 83726	BOLD:AAC3576	Earophila badiata	bb	24-Mar-2011	Germany	North Rhine-Westphalia		Bad Honnef	Rhoendorf, Drachenfels, Weinberg	50.6579	7.21021	70	Axel Hausmann	SNSB, Zoologische Staatssammlung Muenchen
	16	BC ZSM Lep 83727	BOLD:AAC3576	Earophila badiata	bb	17-Apr-2013	Germany	Rhineland-Palatinate		Ettringer	Hochstein (Suedhaenge), Vulkaneifel	50.3708	7.22028	541	Axel Hausmann	SNSB, Zoologische Staatssammlung Muenchen
	17	BC ZSM Lep 83728	BOLD:AAC3576	Earophila badiata	bb	17-Apr-2013	Germany	Rhineland-Palatinate		Ettringer	Hochstein (Suedhaenge), Vulkaneifel	50.3708	7.22028	541	Axel Hausmann	SNSB, Zoologische Staatssammlung Muenchen
	18	BC_LSNOE_Lep_01723	BOLD:AAC3576	Earophila badiata	bb	06-Apr-2009	Austria		Niederosterreich		Zehentegg	48.3172	15.2817	580	Wolfgang Stark	Oekoplus GmbH
	19	BIOUG16786-G07	BOLD:AAC3576	Earophila badiata	bb	11-Mar-2014	Germany	Rhineland-Palatinate	Kreis Ahrweiler	Landskrone		50.552	7.17	194	Kate Perez	Zoologisches Forschungsmuseum Alexander Koenig
	20	BIOUG16786-G09	BOLD:AAC3576	Earophila badiata	bb	11-Mar-2014	Germany	Rhineland-Palatinate	Kreis Ahrweiler	Landskrone		50.552	7.17	194	Kate Perez	Zoologisches Forschungsmuseum Alexander Koenig
	21	BIOUG16786-G12	BOLD:AAC3576	Earophila badiata	bb	11-Mar-2014	Germany	Rhineland-Palatinate	Kreis Ahrweiler	Landskrone		50.552	7.17	194	Kate Perez	Zoologisches Forschungsmuseum Alexander Koenig
	22	CCDB-02114 E06	BOLD:AAC3576	Earophila badiata	bb	02-Apr-2009	Austria	Upper Austria			St. Konrad - Haeusern	47.92	13.9	580	Franz Puehringer	Research Collection of Franz Puehringer
	23	CCDB-36592 B12		Earophila badiata	b	14-May-2014	Russia	Irkutskaya Oblast	Irkutsky District		Lavrentyevo	52.145	104.301		Ilya A Makhov
	24	KLM Lep 01780	BOLD:AAC3576	Earophila badiata	bb	2014-11-17	Austria		Kaernten	Klagenf.B.	Magdalensberg: Archaeologiepark	46.725	14.431	920	Christian Wieser	Landesmuseum Kaernten
	25	KLMLep15836	BOLD:AAC3576	Earophila badiata	bb	06-May-2022	Italy	Piedmont			Pequerel, NE; Via Colle delle Finestre; Cottische	45.053	7.075	1800	Christian Wieser	Landesmuseum Kaernten
	26	ME33A	PV138762	Earophila badiata	bb	15-May-2021	Finland	U	Järvenpää		Lammaskatu 5	60.2835	25.0715	50	Mikael Englund	LUOMUS, Finnish Museum of Natural History
	27	ME56	PV138766	Earophila badiata	bb	4-7-May-2007	Finland	U	Espoo	Svinösund		60.1129	24.4141	10	Mikael Englund	LUOMUS, Finnish Museum of Natural History
	28	ME68	PV138770	Earophila badiata	bb	2021	Finland	EH	Hämeenkoski			61.0119	25.0902	100	Mikael Englund	LUOMUS, Finnish Museum of Natural History
	29	MM05959	BOLD:AAC3576	Earophila badiata	bb	20-May-2007	Finland	Aland Islands	Alandia		Maarianhamina	60.061	19.953		Marko Mutanen	University of Oulu, Zoological Museum
	30	MM06000	BOLD:AAC3576	Earophila badiata	bb	21-May-2007	Finland	Aland Islands	Alandia		Lemland	60.008	20.127		Marko Mutanen	University of Oulu, Zoological Museum
	31	MM15803	BOLD:AAC3576	Earophila badiata fennokarelica	bf	05-May-2006	Finland	PK	Karelia borealis		Outokumpu	62.72	29.014		Marko Mutanen	University of Oulu, Zoological Museum
	32	MM15804	BOLD:AAC3576	Earophila badiata fennokarelica	bf	05-May-2006	Finland	PK	Karelia borealis		Outokumpu	62.72	29.014		Marko Mutanen	University of Oulu, Zoological Museum
	33	NHMO Lep2011.005	BOLD:AAC3576	Earophila badiata	bb	24-Apr-2011	Norway		Rygge		Sildebauen	64.9778	16.6703		Leif Aarvik	University of Oslo, Natural History Museum
	34	NHMO-DAR-10921	BOLD:AAC3576	Earophila badiata	bb	05-Jun-2010	Norway	Oppland	Nordre Land		Tranligrenda	60.7918	10.1358		Kai Berggren	University of Oslo, Natural History Museum
	35	NHMO-DAR-10923	BOLD:AAC3576	Earophila badiata	bb	18-Apr-2007	Norway	Vest-Agder	Kristiansand		Ostre Randoy	58.0912	8.11632		Kai Berggren	University of Oslo, Natural History Museum
	36	TLMF Lep 08815	BOLD:AAC3576	Earophila badiata	bb	26-Mar-2012	Austria	Vorarlberg	Umg.Koblach		Koblach, Schlossberg N	47.317	9.617	450	Peter Huemer	Tiroler Landesmuseum Ferdinandeum
	37	TLMF Lep 09458	BOLD:AAC3576	Earophila badiata	bb	13-Apr-2013	Italy	South Tyrol	Suedtirol		Taufers/ Waalweg	46.657	10.477	1250	Peter Huemer	Tiroler Landesmuseum Ferdinandeum
	38	TLMF Lep 09476	BOLD:AAC3576	Earophila badiata	bb	18-Apr-2013	Italy	South Tyrol	Suedtirol		Taufers/ Waalweg	46.657	10.477	1250	Peter Huemer	Tiroler Landesmuseum Ferdinandeum
	39	TLMF Lep 09757	BOLD:AAC3576	Earophila badiata	bb	02-May-2013	Austria	Tyrol	Nordtirol		Alter Zoll/ Fliess SE	47.117	10.64	920	Peter Huemer	Tiroler Landesmuseum Ferdinandeum
	40	TLMF Lep 14578	BOLD:AAC3576	Earophila badiata	bb	06-May-2014	Austria	Tyrol	Nordtirol		unterhalb Farst/ Umhausen N	47.157	10.923	1100	Peter Huemer	Tiroler Landesmuseum Ferdinandeum
	41	ME40	PV138763	Earophila badiata	b	12-May-2000	China	Hellongiang			Fengin Bios. Res.	46.2117	128.144		Mikael Englund	LUOMUS, Finnish Museum of Natural History
	42	ME51	PV138764	Earophila badiata fennokarelica	bf	Ex ovo 1993	Finland	PK	Joensuu		Pyhäselkä	62.246	29.584	100	Mikael Englund	LUOMUS, Finnish Museum of Natural History
	43	ME55	PV138765	Earophila badiata	b	01-May-1998	Russia	Buryatia	Taiga forest		R-438 on Haim	53.0534	108.473	550	Mikael Englund	LUOMUS, Finnish Museum of Natural History
	44	ME62	PV138766	Earophila badiata fennokarelica	bf	29-Apr-1990	Finland	PK	Lieksa		Kylänlahti	63.1859	30.0134	100	Mikael Englund	LUOMUS, Finnish Museum of Natural History
	45	ME65	PV138768	Earophila badiata	bb	29.4.-9.5.2016	Finland	U	Helsinki		Vallisaari	60.13	25	10	Mikael Englund	LUOMUS, Finnish Museum of Natural History
	46	ME66A	PV138769	Earophila badiata fennokarelica	bf	22-Apr-1989	Finland	PK	Lieksa		Kylänlahti	63.1859	30.0134	100	Mikael Englund	LUOMUS, Finnish Museum of Natural History
	47	PS2316	PV138771	Earophila badiata	bb	11-15-May-2015	Finland	U	Mäntsälä		Anttila	60.65	25.29	100	Pasi Sihvonen	LUOMUS, Finnish Museum of Natural History
	48	BC ZSM Lep 93746_NGS	BOLD:AAC3576	Earophila kolomietsi	k	10-May-1999	Kazakhstan			Kalbinski Mt.	Kopirli, 20km Ber. Taniti	47.6415	66.3759	1200	Axel Hausmann	SNSB, Zoologische Staatssammlung Muenchen	paratype
	49	BC ZSM Lep 93747_NGS	BOLD:AAC3576	Earophila kolomietsi	k	06-May-1998	Kazakhstan				30km N Ust-Kamenogorska	47.6415	66.3759		Axel Hausmann	SNSB, Zoologische Staatssammlung Muenchen	paratype
		Removed
		ME41		Earophila badiata			Finland	U	Espoo			60.1129	24.4141		Mikael Englund	LUOMUS, Finnish Museum of Natural History
